# Supplementary material
Source: PubMed Central journal article supplement (PMC4787637)

**Appendix A** Assessment of visual function using (A) Humphrey visual field (24-2 central threshold), the numerical result indicates the visual threshold at each location; this is represented graphically in the greyscale diagram. The total deviation represents the difference in the response from a normal age matched control population at each location in the field. The mean deviation reflects the total deviation with negative figures indicating an abnormal field. (B) illustrates a Pelli-Robson contrast sensitivity chart and (C) illustrates a Farnsworth Munsell 100 Hue colour assessment, subjects arrange randomly assorted colour discs by increasing hue [posted as supplied by author]

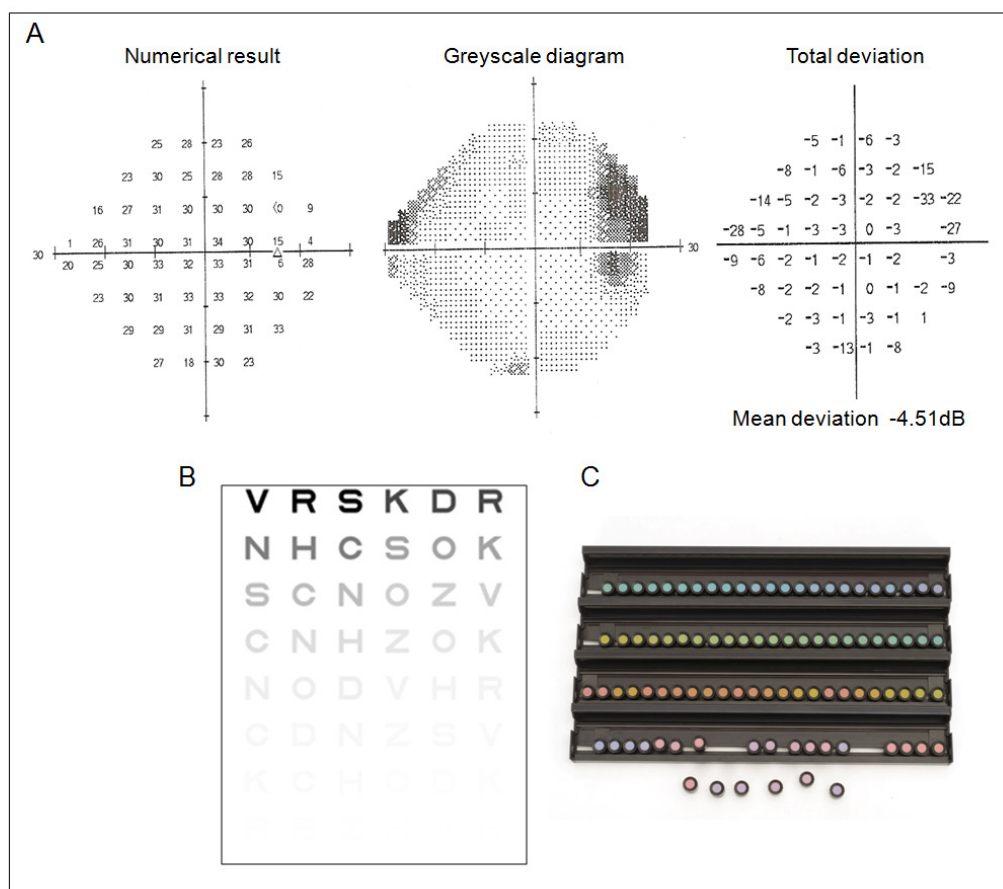

Supplement: sina726950.ww1_default.pdf [file sina726950.ww1_default.pdf]
