# Supplementary material
Source: PubMed Central journal article supplement (PMC4787637)
Supplement: sina726950.ww2_default.pdf [file sina726950.ww2_default.pdf]

**Appendix B** Frisen Grading: Classification of stages of optic disc swelling [posted as supplied by author]

| Stage | Signs      |               |                  |                                   |             |
|-------|------------|---------------|------------------|-----------------------------------|-------------|
|       | Nasal blur | Temporal blur | Peripheral TOVS* | Central TOVS* or filled optic cup | Smooth dome |
| 0     | -          | -             | -                | -                                 | -           |
| 1     | +          | -             | -                | -                                 | -           |
| 2     | +          | +             | -                | -                                 | -           |
| 3     | +          | +             | +                | -                                 | -           |
| 4     | +          | +             | +                | +                                 | -           |
| 5     | +          | +             | ±                | ±                                 | +           |

The optic disc is grade according to appearance. \* TOVS indicates total obscuration of major vessel segment(s) by swollen axons. + indicates present, - indicates absent. Grading described by *Frisen L. JNNP 1982;45:13-18.*
